# Supplementary material for: The CshA DEAD-box RNA helicase is important for quorum sensing control in Staphylococcus aureus
Source: PubMed Central journal article supplement — RNA Biol. 2013 Jan 1;10(1):157–65. doi: 10.4161/rna.22899 (PMC3590232; doi:10.4161/rna.22899), 2013-01-01
Supplement: rna-10-157-s01.pdf [file rna-10-157-s01.pdf]

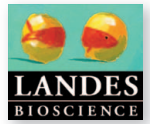

## Supplemental Material to:

Stella Oun, Peter Redder, Jean-Philippe Didier, Patrice François, Anna-Rita Corvaglia, Elena Buttazzoni, Caroline Giraud, Myriam Girard, Jacques Schrenzel and Patrick Linder

The CshA DEAD-box RNA helicase is important for quorum sensing control in *Staphylococcus aureus*

2012; 10(1)

<http://dx.doi.org/10.4161/rna.22899>

[www.landesbioscience.com/journals/rnabiology/article/22899/](http://www.landesbioscience.com/journals/rnabiology/article/22899/)



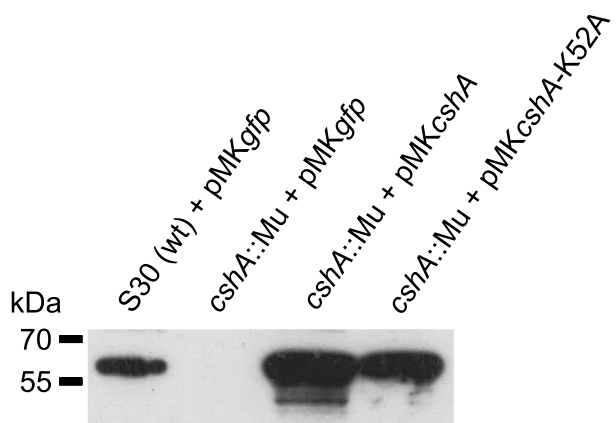

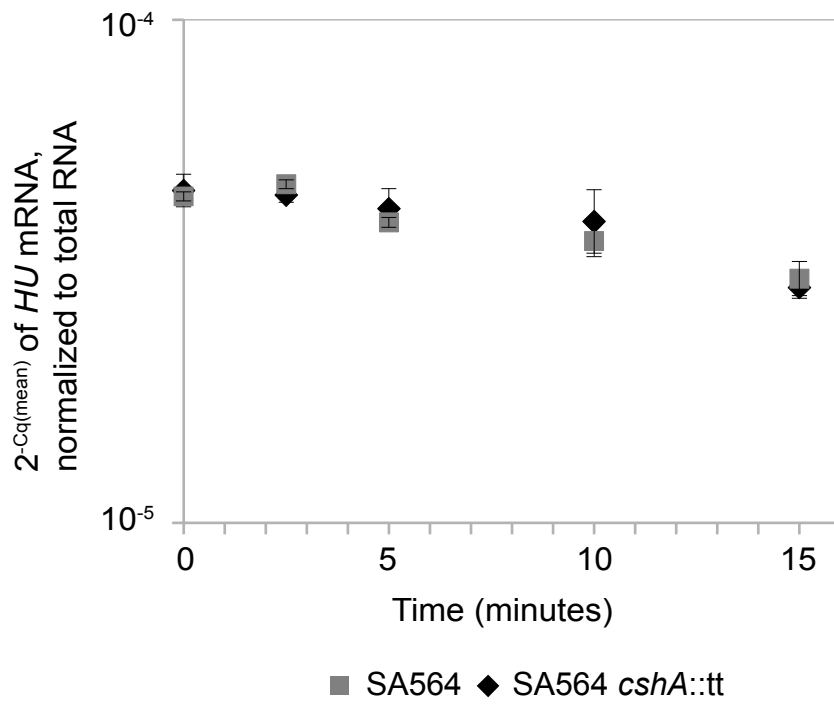

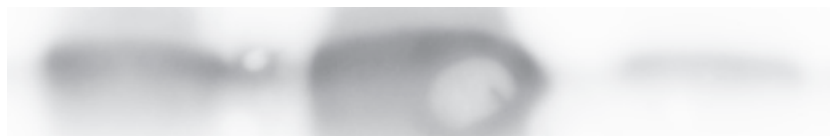

S30

*cshA*<sup>-</sup>

*cshA*<sup>-</sup>  
*agrA*<sup>-</sup>

A

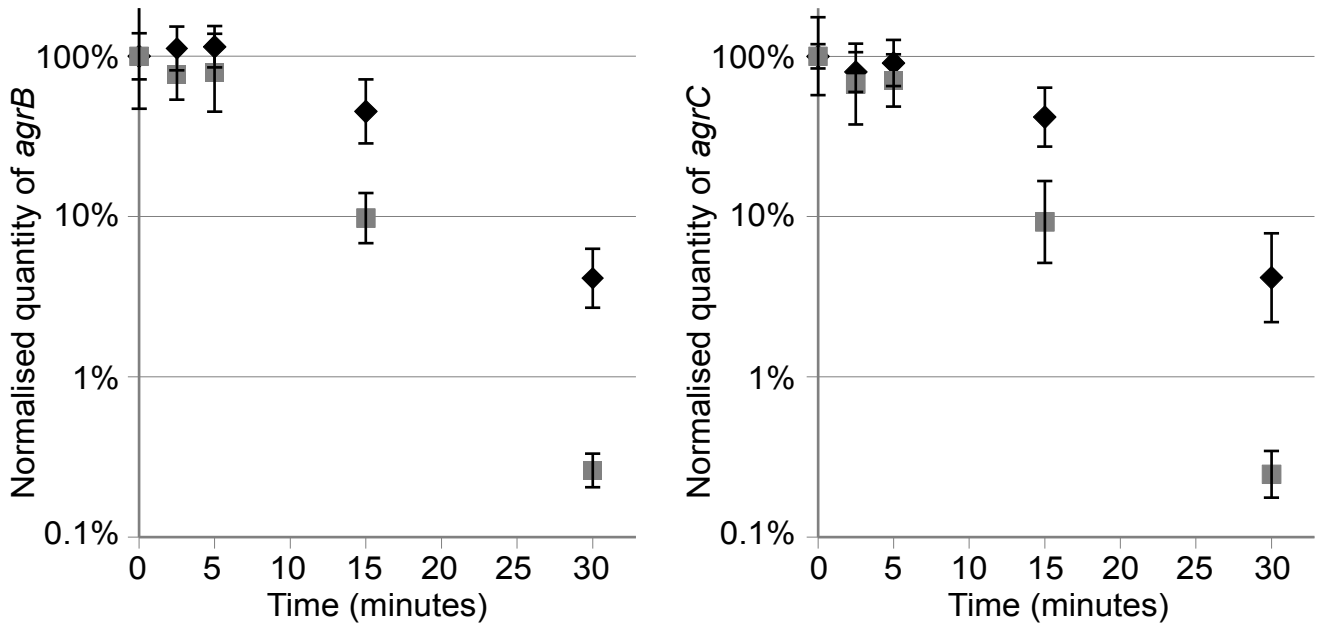

B

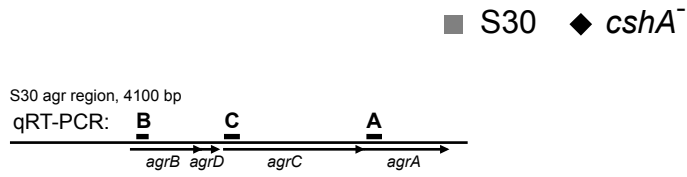

**A**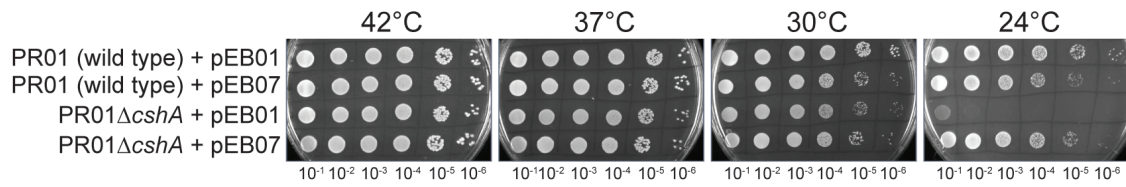**B**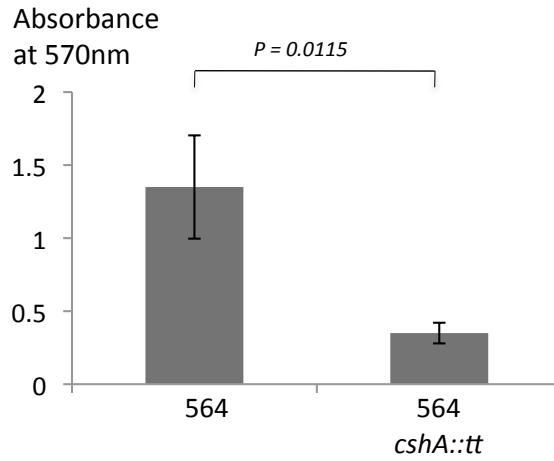**C**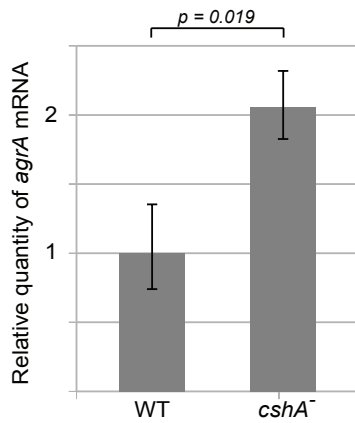**D**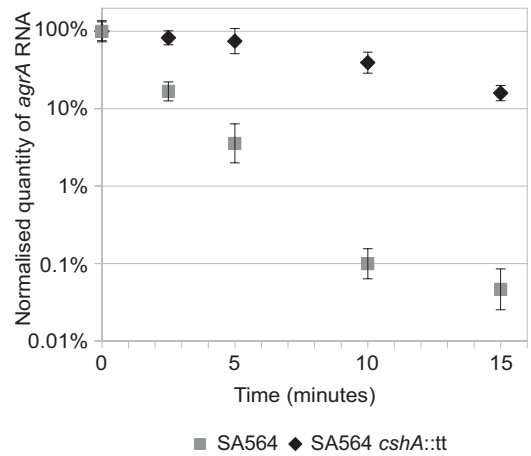**E**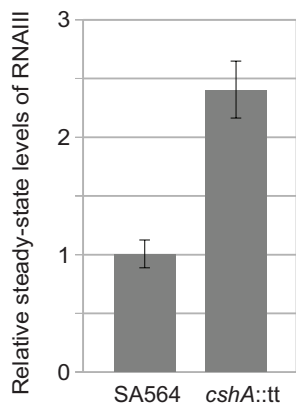**F**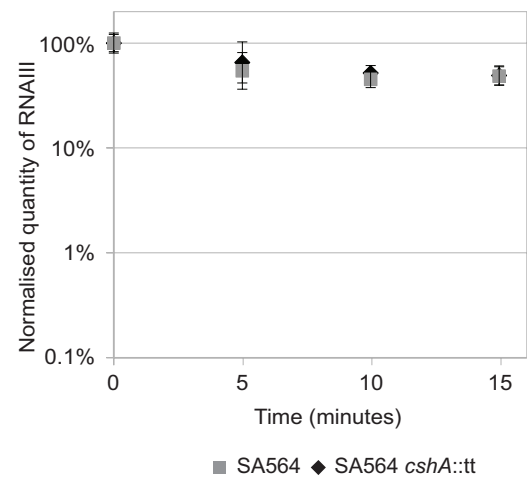

**Supporting Material for:**

The CshA DEAD-box RNA helicase is important for quorum sensing control in *Staphylococcus aureus*

Stella Oun\*<sup>1</sup>, Peter Redder\*<sup>1</sup>, Jean-Philippe Didier<sup>1</sup>, Patrice François<sup>2</sup>, Anna Corvaglia<sup>1</sup>, Elena Buttazzoni<sup>1</sup>, Caroline Giraud<sup>1</sup>, Myriam Girard<sup>2</sup>, Jacques Schrenzel<sup>2</sup>, Patrick Linder<sup>1</sup>

<sup>1</sup> Department of Microbiology and Molecular Medicine, CMU, Medical Faculty, University of Geneva, 1211 Genève 4; Switzerland

<sup>2</sup> Genomic Research Laboratory, Dept of Medical Specialties, Geneva University Hospitals and University of Geneva, 1211 Genève 14; Switzerland

**Supporting Figure 1:** Alignment of the DEAD-box protein sequences from *Bacillus subtilis* and *Staphylococcus aureus*.

A) Phylogram of the sequences showing the relationship of the different proteins (ClustalW).

B) Alignment of the sequences with the conserved motifs and the C-terminal region indicated. The lysine to alanine change (K52A) in motif I is indicated by an asterisk.

**Supporting Figure 2:** Western blot analysis of the parental S30 strain, the *cshA::Mu* mutant strain with a plasmid carrying *gfp* as negative control, the mutant strain complemented with the wild type and with the *cshA-K52A* mutant genes. The strains were grown in 1% xylose as for figure 2. The blot was probed using polyclonal rabbit anti-CshA antibodies. Ponceau staining was used to adjust loading of the samples.

**Supporting Figure 3:** HU mRNA stability is not affected by the *cshA* mutation. RNA was extracted at different time points after rifampicin treatment (as in figure S5D). For qRT-PCR, 2.5 ng of total RNA from each time-point was used to measuring HU mRNA levels, to demonstrate that HU mRNA decay is unaffected by the *cshA* mutation. Grey squares, SA564; Black diamonds, SA564 *cshA::tt*. Error bars represent SD.

**Supporting Figure 4:** Western blot analysis of alpha hemolysin production. TCA precipitated supernatant of exponentially growing wild type, *cshA* mutant, and *cshA*



*agrA* double mutant strains were separated on PAGE and analyzed on a Western blot using a commercial anti-alpha-hemolysin antibody.

**Supporting Figure 5:** A) Decay of *agrB* and *agrC* from S30 measured by qRT-PCR. The mRNAs from S30 (grey squares) and *csxA* mutant (black diamonds) strains were quantified by qRT-PCR after rifampicin treatment as in figure 4. Error bars represent 95% confidence intervals. B) Overview of the *agr* chromosomal region with A, B, and C indicating the positions of the qRT-PCR amplicons.

**Supporting figure 6: A)** PR01 and the PR01 $\Delta$ *csxA* mutant with pEB01 (empty vector) and pEB07 (*csxA* containing plasmid) were spotted as in Figure 2 in serial dilutions and grown at the indicated temperature for 2 to 4 days.

**B)** Biofilm formation is reduced in absence of a functional copy of *csxA* in SA564. Biofilm formation was analyzed as in figure 3A by crystal violet assay. The amount of biofilm was measured after solubilization of the CV in ethanol and absorbance was determined at 570 nm. The difference between the wild type and the mutant was significant ( $p = 0.0115$ )

**C)** The *agrA* mRNA level is increased in the SA564 *csxA* mutant strain. Left panel: RNA from these strains was treated as in Figure 4A. Error bars represent SD and an unpaired T-test gave  $p = 0.019$ .

**D)** Stability assay of *agrA* mRNA in strain SA564 and the SA564 *csxA* mutant strain, as in Figure 4B and Material and Methods. Error bars represent 95% confidence intervals.

**E)** Steady state levels of RNAIII are increased in the SA564 *csxA* mutant strain. RNA from wild type and mutant strains was treated as in Figure 4A. Error bars represent SD

**F)** Stability assay of RNAIII in strain SA564 and the SA564 *csxA* mutant strain was performed as in **D**. The stability is not affected by the *csxA* mutation. Error bars represent 95% confidence intervals.

**Supporting Table 1: Oligonucleotides**

|                                   | Gene                                  | Primer/probe                             | Sequence                             | 5'label | 3'label |
|-----------------------------------|---------------------------------------|------------------------------------------|--------------------------------------|---------|---------|
| qRT-PCR                           | <i>HU</i>                             | HU_1687F                                 | GGT TTC GGT AAC TTT GAG G            | FAM     | TAMRA   |
|                                   |                                       | HU_1747R                                 | CAG TTT GAG GGT TAC GAC C            |         |         |
|                                   |                                       | HU_1708T_FAM                             | CGT GAA CGT GCT GCA CGT AA           |         |         |
|                                   | <i>agrA</i>                           | AgrA-34F                                 | CAAAGAGAAAACATGGTTACCATTATTAA        | FAM     | TAMRA   |
| AgrA-135R                         | CTCAAGCACCTCATAAGGATTATCAG            |                                          |                                      |         |         |
| AgrA-83T                          | AAAAGCCTATGGAAATTGCCCTCGCA            |                                          |                                      |         |         |
| <i>agrB</i>                       | AgrB_F                                | AACAAAATTGACCAGTTTGCCA                   | FAM                                  | MGB     |         |
| AgrB_R                            | CGTACTTGCAAAAATTGAATATGATCTAA         |                                          |                                      |         |         |
| AgrB_FAM-MGB                      | GTATCTTCAAAAGAGAAATAA                 |                                          |                                      |         |         |
| <i>agrC</i>                       | AgrC_type I_70F                       | CCAGCTATAATTAGTGGTATTAAGTACAGTAACT       | FAM                                  | MGB     |         |
| AgrC_type I_175R                  | AGGACGCGCTATCAAACATTTT                |                                          |                                      |         |         |
| AgrC_type I_FAM_MGB               | ATAGGAATTTTCGACATTATC                 |                                          |                                      |         |         |
|                                   |                                       |                                          |                                      |         |         |
| Targetron disruption              | <i>csxA</i>                           | 97 98a-IBS                               | AAAAAAGCTTATAATTATCCTTACAAGGCTATCAA  |         |         |
|                                   |                                       | 97 98a-EBS1d                             | GTGCGCCAGATAGGGTG                    |         |         |
|                                   |                                       | 97 98a-EBS2                              | CAGATTGTACAAATGTGGTGATAACAGATAAGTCT  |         |         |
|                                   |                                       | <i>csxA</i> -verification forward        | ATCAATTTAACTTACCTTTCTTT              |         |         |
|                                   | <i>csxA</i> -verification reverse     | TGAACGCAAGTTTCTAATTTTCGGTTCCTTGTCGAT     |                                      |         |         |
|                                   |                                       | AGAGGAAAAGTGTCT                          |                                      |         |         |
|                                   |                                       | GCTTACATCTTATCTAATGC                     |                                      |         |         |
|                                   |                                       | GCTTGGATTGCTTTAGGC                       |                                      |         |         |
|                                   | <i>csxB</i>                           | 480 481s_IBS                             | AAAAAAGCTTATAATTATCCTTAGATCTCATGATT  |         |         |
| 480 481s_EBS1d                    | GTGCGCCAGATAGGGTG                     |                                          |                                      |         |         |
| 480 481s_EBS2                     | CAGATTGTACAAATGTGGTGATAACAGATAAGTCA   |                                          |                                      |         |         |
|                                   | TGATTGATAACTTACCTTTCTTTGT             |                                          |                                      |         |         |
|                                   | TGAACGCAAGTTTCTAATTTTCGATTAGATCTCGAT  |                                          |                                      |         |         |
|                                   | AGAGGAAAAGTGTCT                       |                                          |                                      |         |         |
| <i>agrA</i>                       | 442 443a-IBS                          | AAAAAAGCTTATAATTATCCTTACTGAACTACTGC      |                                      |         |         |
| 442 443a-EBS1d                    | GTGCGCCAGATAGGGTG                     |                                          |                                      |         |         |
| 442 443a-EBS2                     | CAGATTGTACAAATGTGGTGATAACAGATAAGTCT   |                                          |                                      |         |         |
| <i>agrA</i> -verification forward | ACTGCCATAACTTACCTTTCTTTGT             |                                          |                                      |         |         |
| <i>agrA</i> -verification reverse | TGAACGCAAGTTTCTAATTTTCGGTTTTTCAGTCGAT |                                          |                                      |         |         |
|                                   | AGAGGAAAAGTGTCT                       |                                          |                                      |         |         |
|                                   | ATGGTATCGAGAATCTTAAAG                 |                                          |                                      |         |         |
|                                   | TTAGCGTTTAGCAATCGCG                   |                                          |                                      |         |         |
| Shuttle plasmids                  | <i>CshA</i>                           | forward                                  | CGGGTACCAAGGAGGAACAATCTTGCAAAATTTT   |         |         |
|                                   |                                       | backward                                 | AAAGAACTAGGGTTTC                     |         |         |
|                                   |                                       | GAT mutation                             | AAAAGTGCAGTTATTTTTGATGGTCAGCAAATGTG  |         |         |
|                                   |                                       | GAT mutation                             | GGAATACCGAATGCTCCTGTTGCACCTGTACCGG   |         |         |
| Expression plasmids               | RNase J1                              |                                          | CGGGTACAGGTGCAACAGGAGCATTCCGGTATTCC  |         |         |
|                                   |                                       |                                          | GGGCATATGAAACAATTACATCCAAATGAAGTAG   |         |         |
|                                   | RNase J2                              |                                          | GTG                                  |         |         |
|                                   |                                       |                                          | CGCGGATCCTTATTATTTATTGTTTGATTCTTTTTG |         |         |
|                                   | RNase J2                              |                                          | TTCGTTTACC                           |         |         |
|                                   |                                       |                                          | GGGCATATGAGTTTAATAAAGAAAAAGAATAAAGA  |         |         |
|                                   | <i>CshA</i>                           |                                          | TATTCGC                              |         |         |
|                                   |                                       |                                          | CGCGGATCCTTATTAAATTTTCAGAAATTACTGGAA |         |         |
| <i>CshA</i>                       |                                       | TAATCATAGG                               |                                      |         |         |
| <i>CshA</i>                       |                                       | GTA CGA CTA GT C ATA TGC AAA ATT TTA AAG |                                      |         |         |
| <i>CshA</i>                       |                                       | AAC TAG GGA                              |                                      |         |         |
| <i>CshA</i>                       |                                       | ACC GTC TCG AGT TTT TGA TGG TCA GCA AAT  |                                      |         |         |
|                                   |                                       | GTG                                      |                                      |         |         |
